# Supplementary material for: The Presence, Location, and Degree of Late Gadolinium Enhancement in Relation to Myocardial Dysfunction and Poor Prognosis in Patients with Systemic Lupus Erythematosus
Source: MDPI journal article supplement (doi:10.3390/jcdd10110451), 2023-10-31
Supplement: s1 [file s1]

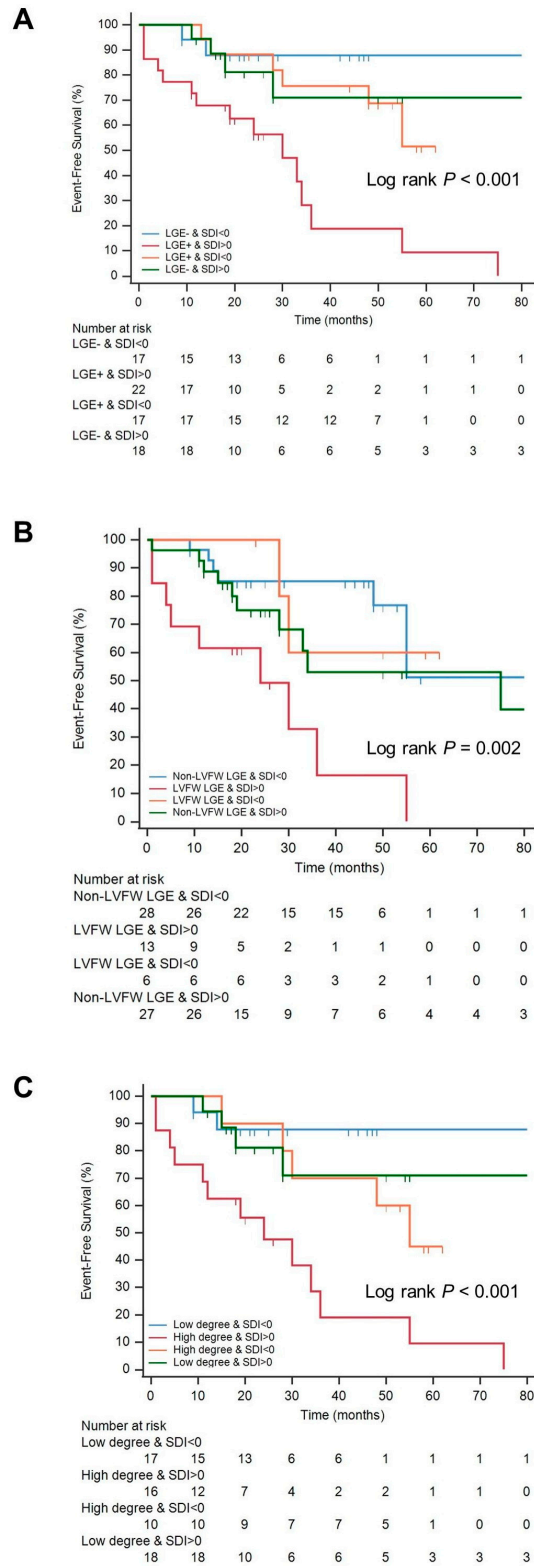

**Figure S1.** Kaplan–Meier curves for major adverse cardiac events. The differences in major adverse cardiac events were stratified by SLE related organ damage (measured by SDI > 0) combined with LGE presence (A), locations of LGE (B), and degrees of LGE (C), respectively. Abbreviations: LGE, late gadolinium enhancement; LVFW, left ventricular free-wall; SDI, the Systemic Lupus International Collaborating Clinics/American College of Rheumatology (SLICC/ACR) Damage Index; SLE, systemic lupus erythematosus.

**Table S1.** Cardiac manifestations and SLE details of patients with SLE.

| Variables                                | Total<br>(N=74)  | LGE +<br>(N=39)     | LGE -<br>(N=35)     | <i>p</i> Value |
|------------------------------------------|------------------|---------------------|---------------------|----------------|
| <b>Cardiac manifestation</b>             |                  |                     |                     |                |
| SBP, mmHg                                | 116±13           | 116±13              | 116±13              | 0.802          |
| DBP, mmHg                                | 75±11            | 77±11               | 73±12               | 0.195          |
| HR, beats/min                            | 84±12            | 85±11               | 83±14               | 0.506          |
| Cardiac symptom, n (%)                   | 57 (77)          | 35 (90)             | 22 (63)             | 0.006          |
| Chest pain, n (%)                        | 18 (24)          | 12 (31)             | 6 (17)              | 0.173          |
| Dyspnea, n (%)                           | 37 (50)          | 24 (62)             | 13 (37)             | 0.036          |
| Palpitation, n (%)                       | 14 (19)          | 7 (18)              | 7 (20)              | 0.822          |
| Edema, n (%)                             | 21 (28)          | 11 (28)             | 10 (29)             | 0.972          |
| Arrhythmia, n (%)                        | 21 (28)          | 14 (36)             | 7 (20)              | 0.13           |
| Ventricular arrhythmia, n (%)            | 10 (14)          | 5 (13)              | 5 (14)              | 0.854          |
| Atrial arrhythmia, n (%)                 | 9 (12)           | 5 (13)              | 4 (12)              | >0.999         |
| Conduction block, n (%)                  | 3 (4)            | 2 (5)               | 1 (3)               | >0.999         |
| pericardial effusion, n (%)              | 36 (49)          | 20 (51)             | 16 (46)             | 0.632          |
| LDL-C, mmol/L, median (IQR)              | 2.4 (1.9-3.2)    | 2.52 (2.03-3.34)    | 2.355 (1.783-2.885) | 0.442          |
| <b>SLE detail</b>                        |                  |                     |                     |                |
| Mucocutaneous manifestations, n (%)      | 37 (50)          | 18 (46)             | 19 (54)             | 0.485          |
| Musculoskeletal manifestations, n (%)    | 27 (37)          | 12 (31)             | 15 (43)             | 0.281          |
| NPSLE, n (%)                             | 15 (20)          | 7 (18)              | 8 (23)              | 0.6            |
| Lupus nephritis, n (%)                   | 37 (50)          | 19 (49)             | 18 (52)             | 0.816          |
| Serum C3, g/l, median (IQR)              | 0.69 (0.35-0.85) | 0.705 (0.431-0.952) | 0.601 (0.329-0.845) | 0.559          |
| Serum C4, g/l, median (IQR)              | 0.10 (0.03-0.15) | 0.098 (0.039-0.147) | 0.055 (0.016-0.146) | 0.158          |
| CRP, mg/l, median (IQR)                  | 2.9 (1.0-12.7)   | 3.6 (0.56-12.5)     | 2.76 (1.02-11.89)   | 0.733          |
| ESR, mm/h, median (IQR)                  | 31 (14-59)       | 29 (14-56)          | 23 (14-62)          | 0.653          |
| Anti-nuclear antibody, n (%)             | 70 (95)          | 36 (93)             | 34 (97)             | 0.687          |
| Anti-double-stranded DNA, n (%)          | 49 (66)          | 23 (59)             | 26 (74)             | 0.164          |
| Anti-Smith antibodies, n (%)             | 24 (32)          | 12 (31)             | 12 (34)             | 0.747          |
| Anticardiolipin antibody, n (%)          | 15 (20)          | 10 (26)             | 5 (14)              | 0.225          |
| Anti-β2-glycoprotein 1 antibodies, n (%) | 16 (22)          | 10 (26)             | 6 (17)              | 0.375          |
| Lupus anticoagulant, n (%)               | 22 (30)          | 13 (33)             | 9 (26)              | 0.474          |
| 24-hour urine protein, g, median (IQR)   | 0.2 (0.1-1.0)    | 0.23 (0.108-1.003)  | 0.205 (0.118-1.593) | 0.726          |
| Serum creatinine, umol/L, median (IQR)   | 63 (50-83)       | 64 (50-99)          | 61 (50-75)          | 0.279          |
| D-Dimer, mg/L FEU, median (IQR)          | 1.7 (0.6-3.8)    | 1.82 (0.49-3.62)    | 1.66 (0.93-3.99)    | 0.548          |

Abbreviations: CRP, C-reactive protein; DBP, diastolic blood pressure; ESR: erythrocyte sedimentation rate; HR, heart rate; IQR, interquartile range; LDL-C, low-density lipoprotein cholesterol; LGE, late gadolinium enhancement; LVFW, left ventricular free-wall; NPSLE: neuropsychiatric lupus; SBP, systolic blood pressure; SLE, systemic lupus erythematosus.

**Table S2.** Clinical and imaging parameters between SLE patients with and without LVFW LGE.

| Variables                                       | LVFW LGE<br>(N=19) | No LVFW LGE<br>(N=55) | <i>p</i> Value |
|-------------------------------------------------|--------------------|-----------------------|----------------|
| <b>Clinical variables</b>                       |                    |                       |                |
| Age, years                                      | 39±15              | 33±10                 | 0.094          |
| Female gender, n (%)                            | 18 (95)            | 52 (95)               | >0.999         |
| SLEDAI-2K score, median (IQR)                   | 13 (6-22)          | 10 (5-18)             | 0.638          |
| SDI, median (IQR)                               | 2 (0-3)            | 0 (0-1)               | 0.024          |
| NT-proBNP, pg/mL, median (IQR)                  | 2699 (835-6779)    | 643 (186-2592)        | 0.002          |
| cTnI, ug/L, median (IQR)                        | 0.25 (0.02-0.76)   | 0.02 (0-0.10)         | 0.004          |
| <b>Conventional echocardiographic parameter</b> |                    |                       |                |
| IVSD, mm                                        | 9.7±1.3            | 7.9±1.5               | <0.001         |
| LVPWD, mm                                       | 9.2±1.3            | 8.1±1.4               | 0.005          |
| LVEDD, mm                                       | 48±7               | 46±6                  | 0.402          |
| LVESD, mm                                       | 33±7               | 31±6                  | 0.226          |
| LVEF, %                                         | 59±11              | 62±10                 | 0.245          |
| LVFS, %                                         | 32±8               | 34±7                  | 0.204          |
| E/A ratio                                       | 1.3±0.5            | 1.2±0.3               | 0.838          |
| LA diameter, mm                                 | 37±6               | 32±5                  | 0.003          |
| PASP, mmHg, median (IQR)                        | 29 (24-36)         | 27 (22-38)            | 0.267          |
| TAPSE, mm                                       | 17±5               | 18±5                  | 0.336          |
| TRV, m/s                                        | 2.7±0.8            | 2.6±0.6               | 0.364          |
| RV diameter, mm                                 | 23±4               | 22±5                  | 0.458          |
| <b>STE parameter</b>                            |                    |                       |                |
| GWl, mmHg%                                      | 1210±304           | 1362±344              | 0.091          |
| LVFW WI, mmHg%                                  | 1215±331           | 1394±372              | 0.068          |
| Septal WI, mmHg%                                | 1198±288           | 1298±315              | 0.227          |
| GCW, mmHg%                                      | 1499±320           | 1647±356              | 0.112          |
| LVFW CW, mmHg%                                  | 1485±336           | 1673±379              | 0.06           |
| Septal CW, mmHg%                                | 1526±359           | 1597±350              | 0.455          |
| GWW, mmHg%, median (IQR)                        | 156 (138-178)      | 125 (82-181)          | 0.043          |
| LVFW WW, mmHg%, median (IQR)                    | 152 (131-193)      | 109 (82-185)          | 0.02           |
| Septal WW, mmHg%, median (IQR)                  | 165 (124-193)      | 150 (79-186)          | 0.301          |
| GWE, %                                          | 87.4±4.6           | 90.9±4.8              | 0.007          |
| LVFW WE, %                                      | 87.1±6.2           | 91.4±4.5              | 0.002          |
| Septal WE, %                                    | 87.9±4.4           | 89.8±6.0              | 0.203          |
| GLS, %                                          | -14.1±3.3          | -15.6±3.4             | 0.09           |
| LVFW LS, %                                      | -13.4±4.6          | -15.7±3.9             | 0.037          |
| Septal LS, %                                    | -12.9±3.5          | -14.2±3.4             | 0.174          |
| PSD, ms                                         | 74±25              | 55±14                 | 0.005          |
| <b>CMR parameter</b>                            |                    |                       |                |
| Native T1, ms                                   | 1408±83            | 1381±65               | 0.171          |
| ECV, %                                          | 34±7               | 32±5                  | 0.21           |
| T2, ms                                          | 43±3               | 42±3                  | 0.514          |

Abbreviations: cTnI, cardiac troponin I; CW, constructive work; ECV, extracellular volume fraction; GCW, left ventricular global constructive work; GLS, left ventricular global longitudinal strain; GWE, left ventricular global work efficiency; GWI, left ventricular global work index; GWW, left ventricular global wasted work; IVSD, inter-ventricular septum thickness at end-diastole; LA, left atrial; LGE, late gadolinium enhancement; LS, longitudinal strain; LVEDD, left ventricular end diastolic diameter; LVEF, left ventricular ejection fraction; LVESD, left ventricular end systolic

diameter; LVFS, left ventricular fraction shortening; LVFW, left ventricular free-wall; LVPWD, the left ventricular posterior wall thickness at end-diastole; NT-proBNP, N-terminal proB-type natriuretic peptide; PASP, systolic pulmonary artery pressure; PSD, left ventricular global peak strain dispersion; RV, right ventricular; SDI, Systemic Lupus International Collaborating Clinics/American College of Rheumatology (SLICC/ACR) Damage Index; SLE, systemic lupus erythematosus; SLEDAI-2K, SLE Disease Activity Index 2000; TAPSE, tricuspid annular plane systolic excursion; TRV, tricuspid regurgitation velocity; WE, work efficiency; WI, work index; WW, wasted work.

**Table S3.** Clinical and imaging parameters of SLE patients with only septal versus only free-wall fibrosis.

| Variables                                       | Only Septal LGE<br>(N=20) | Only LVFW LGE<br>(N=9) | <i>p</i> Value |
|-------------------------------------------------|---------------------------|------------------------|----------------|
| <b>Conventional echocardiographic parameter</b> |                           |                        |                |
| IVSD, mm                                        | 8.1±1.3                   | 9.4±0.7                | 0.005          |
| LVPWD, mm                                       | 8.3±1.1                   | 9.0±1.1                | 0.106          |
| LVEDD, mm                                       | 46±8                      | 48±6                   | 0.634          |
| LVESD, mm                                       | 32±8                      | 33±5                   | 0.729          |
| LVEF, %                                         | 60±11                     | 59±8                   | 0.853          |
| LVFS, %                                         | 32±7                      | 31±6                   | 0.827          |
| E/A ratio                                       | 1.2±0.3                   | 1.2±0.5                | 0.901          |
| LA diameter, mm                                 | 32±6                      | 36±6                   | 0.133          |
| PASP, mmHg, median (IQR)                        | 28 (23-34)                | 28 (24-31)             | 0.813          |
| TAPSE, mm                                       | 17±4                      | 18±5                   | 0.699          |
| TRV, m/s                                        | 2.5±0.6                   | 2.4±0.3                | 0.65           |
| RV diameter, mm                                 | 22±6                      | 21±4                   | 0.697          |
| <b>STE parameter</b>                            |                           |                        |                |
| GWl, mmHg%                                      | 1365±398                  | 1303±335               | 0.689          |
| LVFW WI, mmHg%                                  | 1393±440                  | 1315±387               | 0.649          |
| Septal WI, mmHg%                                | 1309±350                  | 1281±263               | 0.828          |
| GCW, mmHg%                                      | 1643±430                  | 1583±379               | 0.725          |
| LVFW CW, mmHg%                                  | 1667±465                  | 1560±422               | 0.562          |
| Septal CW, mmHg%                                | 1594±404                  | 1629±382               | 0.826          |
| GWw, mmHg%, median (IQR)                        | 136 (80-178)              | 156 (150-170)          | 0.211          |
| LVFW WW, mmHg%, median (IQR)                    | 130 (76-180)              | 157 (133-191)          | 0.12           |
| Septal WW, mmHg%, median (IQR)                  | 146 (75-224)              | 169 (118-193)          | 0.572          |
| GWE, %                                          | 90.4±5.9                  | 88.4±4.2               | 0.388          |
| LVFW WE, %                                      | 90.8±5.4                  | 87.8±7.1               | 0.226          |
| Septal WE, %                                    | 89.4±7.6                  | 89.6±3.3               | 0.953          |
| GLS, %                                          | -15.3±4.2                 | -14.9±3.4              | 0.806          |
| LVFW LS, %                                      | -15.2±5.0                 | -13.9±5.6              | 0.552          |
| Septal LS, %                                    | -14.1±4.3                 | -13.9±2.4              | 0.898          |
| PSD, ms                                         | 53±16                     | 79±29                  | 0.036          |
| <b>CMR parameter</b>                            |                           |                        |                |
| Native T1, ms                                   | 1378±69                   | 1414±97                | 0.283          |
| ECV, %                                          | 31±5                      | 35±5                   | 0.108          |
| T2, ms                                          | 41±2                      | 43±3                   | 0.292          |
| LGE degree, %, median (IQR)                     | 2.05 (1.24-4.86)          | 3.82 (1.58-5.52)       | 0.322          |

Abbreviations are shown in the table S2.

**Table S4.** The association between myocardial function and the degree of LGE in SLE patients.

| Variables                      | >0% & ≤ 1.94%<br>(N=13) | > 1.94% & ≤ 4.94%<br>(N=13) | > 4.94%<br>(N=13) | <i>p</i> Value |
|--------------------------------|-------------------------|-----------------------------|-------------------|----------------|
| LVEF, %                        | 59±11                   | 62±13                       | 57±10             | 0.597          |
| PSD, ms                        | 52±11                   | 66±29                       | 72±22             | 0.021          |
| GLS, %                         | -14.5±3.6               | -15.4±3.6                   | -14.3±4.4         | 0.756          |
| LVFW LS, %                     | -14.3±4.3               | -15.2±4.5                   | -13.5±5.8         | 0.674          |
| Septal LS, %                   | -14.4±4.6               | -13.3±3.1                   | -13.0±4.0         | 0.656          |
| GWI, mmHg%                     | 1290±339                | 1318±382                    | 1260±384          | 0.922          |
| LVFW WI, mmHg%                 | 1303±374                | 1343±421                    | 1273±420          | 0.906          |
| Septal WI, mmHg%               | 1263±318                | 1269±336                    | 1234±336          | 0.959          |
| GCW, mmHg%                     | 1568±387                | 1559±423                    | 1590±366          | 0.979          |
| LVFW CW, mmHg%                 | 1569±422                | 1570±459                    | 1595±387          | 0.985          |
| Septal CW, mmHg%               | 1565±363                | 1538±405                    | 1580±397          | 0.961          |
| GWV, mmHg%, median (IQR)       | 148 (78-168)            | 154 (117-187)               | 167 (132-186)     | 0.507          |
| LVFW WW, mmHg%, median (IQR)   | 141 (84-161)            | 132 (85-200)                | 152 (130-205)     | 0.254          |
| Septal WW, mmHg%, median (IQR) | 154 (87.665-224)        | 165 (90-221)                | 145 (106-193)     | 0.921          |
| GWE, %                         | 90.2±5.5                | 88.0±6.2                    | 88.5±4.7          | 0.562          |
| LVFW WE, %                     | 126±47                  | 141±64                      | 177±70            | 0.103          |
| Septal WE, %                   | 158±86                  | 158±65                      | 158±89            | >0.999         |

Abbreviations: CW, constructive work; GCW, left ventricular global constructive work; GLS, left ventricular global longitudinal strain; GWE, left ventricular global work efficiency; GWI, left ventricular global work index; GWV, left ventricular global wasted work; IQR, interquartile range; LGE, late gadolinium enhancement; LS, longitudinal strain; LVEF, left ventricular ejection fraction; LVFW, left ventricular free wall; PSD, left ventricular global peak strain dispersion; SLE, systemic lupus erythematosus; WE, work efficiency; WI, work index; WW, wasted work.

**Table S5.** Intra- and inter-observer variability for parameters in the noninvasive LV PSL analysis.

| Variables | Intraobserver variability |                | Interobserver variability |                |
|-----------|---------------------------|----------------|---------------------------|----------------|
|           | ICC (95% CI)              | <i>p</i> Value | ICC (95% CI)              | <i>p</i> Value |
| GLS       | 0.984 (0.974, 0.99)       | <0.001         | 0.976 (0.958, 0.986)      | <0.001         |
| PSD       | 0.997 (0.993, 0.998)      | <0.001         | 0.992 (0.971, 0.997)      | <0.001         |
| GWI       | 0.943 (0.909, 0.965)      | <0.001         | 0.924 (0.879, 0.953)      | <0.001         |
| GCW       | 0.954 (0.916, 0.974)      | <0.001         | 0.965 (0.942, 0.979)      | <0.001         |
| GWW       | 0.988 (0.977, 0.994)      | <0.001         | 0.980 (0.967, 0.988)      | <0.001         |
| GWE       | 0.989 (0.98, 0.994)       | <0.001         | 0.973 (0.933, 0.987)      | <0.001         |

Abbreviations: GCW, left ventricular global constructive work; GLS, left ventricular global longitudinal strain; GWE, left ventricular global work efficiency; GWI, left ventricular global work index; GWW, left ventricular global wasted work; ICC, intraclass correlation coefficient; LV, left ventricular; PSD, left ventricular global peak strain dispersion; PSL, pressure-strain loop.
